# Supplementary material
Source: PubMed Central journal article supplement (PMC2350181)
Supplement: NIHMS18433-supplement-01.pdf [file NIHMS18433-supplement-01.pdf]

# Supporting information for: Protein structural variation in computational models and crystallographic data

Dmitry A. Kondrashov, Adam W. Van Wynsberghe, Ryan M. Bannen,  
Qiang Cui, and George N. Phillips, Jr.  
(Dated: December 11, 2006)

TABLE I: Optimization of cutoff distances for DNM

| DNM  | dot   | overlap | IC    |
|------|-------|---------|-------|
| 5 Å  | 0.655 | 0.450   | 0.540 |
| 7 Å  | 0.659 | 0.572   | 0.641 |
| 9 Å  | 0.650 | 0.575   | 0.655 |
| 11 Å | 0.644 | 0.575   | 0.653 |

TABLE II: Optimization of cutoff distances for ANM

| ANM  | dot   | overlap | IC    |
|------|-------|---------|-------|
| 10 Å | 0.574 | 0.565   | 0.621 |
| 12 Å | 0.564 | 0.532   | 0.642 |
| 14 Å | 0.557 | 0.519   | 0.668 |
| 16 Å | 0.564 | 0.533   | 0.674 |

TABLE III: Optimization of cutoff distances for ElNemo

| ElNemo | dot   | overlap | IC    |
|--------|-------|---------|-------|
| 5 Å    | 0.641 | 0.583   | 0.680 |
| 7 Å    | 0.626 | 0.571   | 0.672 |
| 9 Å    | 0.621 | 0.564   | 0.645 |
| 11 Å   | 0.623 | 0.555   | 0.604 |

Table IV: Summary of structural data

| PDB ID | SCOP family       | all chains | usable | anisotropic | <anis>  | refinement |
|--------|-------------------|------------|--------|-------------|---------|------------|
| 1a6m   | a.1.1.2           | 151        | 104    | 44          | 0.35935 | shelx      |
| 1byi   | c.37.1.10         | 224        | 139    | 37          | 0.39236 | shelx      |
| 1c75   | a.3.1.1           | 71         | 38     | 21          | 0.40144 | shelx      |
| 1c7k   | d.92.1.1          | 132        | 85     | 41          | 0.40166 | shelx      |
| 1ea7   | c.41.1.1          | 310        | 251    | 150         | 0.39188 | shelx      |
| 1eb6   | d.92.1.12         | 177        | 125    | 4           | 0.48257 | refmac     |
| 1exr   | a.39.1.5          | 148        | 55     | 39          | 0.31676 | shelx      |
| 1f94   | g.7.1.1           | 63         | 23     | 0           | 0       | shelx      |
| 1f9y   | d.58.30.1         | 158        | 97     | 42          | 0.41108 | shelx      |
| 1g4i   | a.133.1.2         | 123        | 61     | 17          | 0.36853 | shelx      |
| 1g66   | c.69.1.30         | 207        | 145    | 65          | 0.41016 | shelx      |
| 1g6x   | g.8.1.1           | 58         | 21     | 7           | 0.41169 | shelx      |
| 1ga6   | c.41.1.2          | 372/3      | 315    | 131         | 0.39593 | shelx      |
| 1gkm   | a.127.1.2         | 509        | 373    | 250         | 0.35823 | shelx      |
| 1gqv   | d.5.1.1           | 135        | 71     | 32          | 0.37521 | shelx      |
| 1gvk   | b.47.1.2          | 240/4      | 169    | 38          | 0.39058 | shelx      |
| 1gwe   | e.5.1.1           | 503        | 301    | 93          | 0.40309 | refmac     |
| 1hj9   | b.47.1.2          | 223        | 168    | 28          | 0.4191  | shelx      |
| 1ilw   | c.1.8.3           | 303        | 238    | 67          | 0.43425 | shelx      |
| 1iqz   | d.58.1.4          | 81         | 60     | 23          | 0.35991 | shelx      |
| 1iua   | g.35.1.1          | 83         | 29     | 17          | 0.39857 | shelx      |
| 1ix9   | a.2.11.1/d.44.1.1 | 205/205    | 331    | 222         | 0.35627 | shelx      |
| 1ixh   | c.94.1.1          | 321        | 271    | 126         | 0.40954 | shelx      |
| 1j0p   | a.138.1.1         | 108        | 71     | 30          | 0.41371 | shelx      |
| 1jfb   | a.104.1.1         | 404        | 314    | 97          | 0.39815 | shelx      |
| 1k5c   | b.80.1.3          | 335        | 288    | 9           | 0.44981 | shelx      |
| 1kth   | g.8.1.1           | 58         | 21     | 5           | 0.40353 | shelx      |
| 1kwf   | a.102.1.2         | 363        | 288    | 72          | 0.40215 | shelx      |
| 1l9l   | a.64.1.1          | 74         | 33     | 4           | 0.48251 | shelx      |
| 1lkk   | d.93.1.1          | 105/5      | 55     | 24          | 0.41967 | shelx      |
| 1lni   | d.1.1.2           | 96/96      | 103    | 68          | 0.33828 | shelx      |
| 1lug   | b.74.1.1          | 259        | 187    | 112         | 0.35334 | shelx      |
| 1m1q   | a.138.1.3         | 91         | 47     | 24          | 0.39032 | shelx      |
| 1m40   | e.3.1.1           | 263        | 95     | 6           | 0.44647 | shelx      |
| 1mc2   | a.133.1.2         | 122        | 77     | 44          | 0.38122 | shelx      |
| 1mj5   | c.69.1.8          | 302        | 211    | 176         | 0.3491  | shelx      |
| 1muw   | c.1.15.3          | 386        | 202    | 102         | 0.37052 | shelx      |
| 1mwq   | d.58.4.7          | 101/101    | 147    | 43          | 0.39848 | shelx      |
| 1n4w   | c.3.1.2/d.16.1.1  | 504        | 404    | 98          | 0.43339 | shelx      |
| 1n55   | c.1.1.1           | 251        | 181    | 45          | 0.41803 | shelx      |
| 1nki   | d.32.1.2          | 135/135    | 203    | 63          | 0.40563 | shelx      |
| 1nls   | b.29.1.1          | 237        | 166    | 137         | 0.38206 | shelx      |
| 1nws   | d.110.3.1         | 125        | 58     | 25          | 0.37105 | shelx      |
| 1o7j   | c.88.1.1          | 327x4      | 1237   | 593         | 0.41875 | shelx      |
| 1oai   | a.5.2.3           | 59/9       | 27     | 6           | 0.45643 | refmac     |
| 1od3   | b.18.1.10         | 168        | 90     | 20          | 0.44612 | refmac     |
| 1ok0   | b.5.1.1           | 74         | 30     | 17          | 0.40461 | shelx      |
| 1pq7   | b.47.1.2          | 224        | 163    | 35          | 0.4189  | shelx      |
| 1r2m   | b.138.1.1         | 71/71      | 85     | 0           | 0       | refmac     |
| 1r6j   | b.36.1.1          | 82         | 27     | 3           | 0.45907 | shelx      |
| 1rb9   | g.41.5.1          | 53         | 18     | 8           | 0.41841 | shelx      |
| 1rtq   | c.56.5.4          | 299        | 245    | 114         | 0.38605 | shelx      |
| 1sfd   | b.6.1.1           | 105/105    | 164    | 81          | 0.35301 | shelx      |
| 1ssx   | b.47.1.1          | 198        | 134    | 33          | 0.40574 | shelx      |
| 1tg0   | b.34.2.1          | 68         | 29     | 25          | 0.36794 | shelx      |
| 1tqg   | a.24.10.3         | 105        | 31     | 19          | 0.34591 | shelx      |
| 1tt8   | d.190.1.1         | 164        | 117    | 71          | 0.40676 | shelx      |
| 1u2h   | b.1.1.4           | 99         | 47     | 12          | 0.44905 | refmac     |
| 1ufy   | d.79.1.2          | 122        | 63     | 33          | 0.38332 | shelx      |
| 1ug6   | c.1.8.4           | 431        | 385    | 96          | 0.44551 | refmac     |
| 1unq   | b.55.1.1          | 125        | 69     | 18          | 0.39155 | shelx      |

|      |           |         |     |     |         |        |
|------|-----------|---------|-----|-----|---------|--------|
| 1us0 | c.1.7.1   | 316     | 203 | 91  | 0.38627 | shelx  |
| 1v0l | c.1.8.3   | 313     | 241 | 61  | 0.43297 | refmac |
| 1v6p | g.7.1.1   | 62/62   | 41  | 9   | 0.37781 | shelx  |
| 1vbw | d.40.1.1  | 68      | 20  | 14  | 0.3859  | shelx  |
| 1vyr | c.1.4.1   | 364     | 317 | 127 | 0.39561 | shelx  |
| 1vyy | b.115.1.1 | 113     | 59  | 3   | 0.46928 | refmac |
| 1w0n | b.18.1.10 | 131     | 72  | 30  | 0.44108 | refmac |
| 1x6z | d.24.1.1  | 123     | 58  | 0   | 0       | refmac |
| 1x8q | b.60.1.1  | 184     | 94  | 41  | 0.38158 | shelx  |
| 1xmk | a.4.5.19  | 79      | 34  | 21  | 0.40913 | shelx  |
| 1y55 | b.61.1.1  | 126/126 | 167 | 0   | 0       | refmac |
| 1ylj | e.3.1.1   | 263     | 193 | 56  | 0.41735 | shelx  |
| 1zk4 | c.2.1.2   | 251     | 146 | 0   | 0       | refmac |
| 1zzk | d.51.1.1  | 82      | 32  | 19  | 0.37158 | shelx  |
| 2bt9 | b.24.1.1  | 90x3    | 210 | 74  | 0.39931 | shelx  |
| 2bw4 | b.6.1.3   | 340     | 167 | 28  | 0.41039 | refmac |
| 2cws | b.29.1.18 | 237     | 159 | 76  | 0.3842  | shelx  |
| 2f01 | b.61.1.1  | 127/127 | 169 | 73  | 0.41268 | shelx  |
| 2fdn | d.58.1.1  | 55      | 19  | 5   | 0.39841 | shelx  |
| 2pvb | a.39.1.4  | 107     | 55  | 15  | 0.44366 | shelx  |
| 3lzt | d.2.1.2   | 129     | 67  | 37  | 0.39768 | shelx  |
| 7a3h | c.1.8.3   | 303     | 243 | 0   | 0       | refmac |

Table V: Average anisotropy for residues with experimental anisotropy  $< 0.5$ 

| PDB ID | number | experiment | HCA   | ANM   | EIN   | DNM   | BNM   |
|--------|--------|------------|-------|-------|-------|-------|-------|
| 1a6m   | 44     | 0.359      | 0.27  | 0.51  | 0.293 | 0.248 | 0.378 |
| 1byi   | 37     | 0.392      | 0.317 | 0.558 | 0.333 | 0.321 | 0.306 |
| 1c75   | 21     | 0.401      | 0.219 | 0.557 | 0.391 | 0.264 | 0.431 |
| 1c7k   | 41     | 0.402      | 0.31  | 0.591 | 0.439 | 0.348 | 0.364 |
| 1ea7   | 150    | 0.392      | 0.337 | 0.664 | 0.461 | 0.406 | 0.38  |
| 1eb6   | 4      | 0.483      | 0.232 | 0.51  | 0.262 | 0.317 | 0.312 |
| 1exr   | 39     | 0.317      | 0.088 | 0.076 | 0.082 | 0.058 | 0.228 |
| 1f94   | 0      | 0          | 0     | 0     | 0     | 0.000 | 0     |
| 1f9y   | 42     | 0.411      | 0.351 | 0.568 | 0.457 | 0.319 | 0.37  |
| 1g4i   | 17     | 0.369      | 0.29  | 0.394 | 0.333 | 0.255 | 0.294 |
| 1g66   | 65     | 0.41       | 0.33  | 0.629 | 0.46  | 0.368 | 0.371 |
| 1g6x   | 7      | 0.412      | 0.19  | 0.272 | 0.262 | 0.245 | 0.288 |
| 1ga6   | 131    | 0.396      | 0.284 | 0.546 | 0.359 | 0.315 | 0.31  |
| 1gkm   | 250    | 0.358      | 0.261 | 0.588 | 0.232 | 0.232 | 0.276 |
| 1gqv   | 32     | 0.375      | 0.224 | 0.412 | 0.32  | 0.262 | 0.252 |
| 1gvk   | 38     | 0.391      | 0.223 | 0.513 | 0.376 | 0.283 | 0.298 |
| 1gwe   | 93     | 0.403      | 0.223 | 0.218 | 0.019 | 0.020 | 0.34  |
| 1hj9   | 28     | 0.419      | 0.22  | 0.511 | 0.34  | 0.257 | 0.247 |
| 1ilw   | 67     | 0.434      | 0.302 | 0.587 | 0.392 | 0.335 | 0.375 |
| 1iqz   | 23     | 0.36       | 0.205 | 0.446 | 0.394 | 0.307 | 0.319 |
| 1iua   | 17     | 0.399      | 0.289 | 0.585 | 0.466 | 0.338 | 0.369 |
| 1ix9   | 222    | 0.356      | 0.289 | 0.583 | 0.283 | 0.287 | 0.277 |
| 1ixh   | 126    | 0.41       | 0.319 | 0.622 | 0.31  | 0.354 | 0.322 |
| 1j0p   | 30     | 0.414      | 0.256 | 0.551 | 0.309 | 0.304 | 0.357 |
| 1jfb   | 97     | 0.398      | 0.247 | 0.548 | 0.249 | 0.265 | 0.23  |
| 1k5c   | 9      | 0.45       | 0.274 | 0.563 | 0.336 | 0.340 | 0.391 |
| 1kth   | 5      | 0.404      | 0.2   | 0.349 | 0.383 | 0.258 | 0.272 |
| 1kwf   | 72     | 0.402      | 0.291 | 0.618 | 0.435 | 0.343 | 0.391 |
| 1l9l   | 4      | 0.483      | 0.199 | 0.443 | 0.35  | 0.243 | 0.334 |
| 1lkk   | 24     | 0.42       | 0.236 | 0.597 | 0.523 | 0.399 | 0.395 |
| 1lni   | 68     | 0.338      | 0.2   | 0.441 | 0.128 | 0.136 | 0.109 |
| 1lug   | 112    | 0.353      | 0.252 | 0.542 | 0.383 | 0.313 | 0.313 |
| 1m1q   | 24     | 0.39       | 0.204 | 0.39  | 0.322 | 0.261 | 0.374 |
| 1m40   | 6      | 0.446      | 0.317 | 0.512 | 0.424 | 0.313 | 0.355 |
| 1mc2   | 44     | 0.381      | 0.259 | 0.475 | 0.308 | 0.259 | 0.322 |
| 1mj5   | 176    | 0.349      | 0.429 | 0.714 | 0.545 | 0.456 | 0.43  |
| 1muw   | 102    | 0.371      | 0.241 | 0.369 | 0.147 | 0.088 | 0.184 |
| 1mwq   | 43     | 0.398      | 0.257 | 0.459 | 0.299 | 0.242 | 0.227 |
| 1n4w   | 98     | 0.433      | 0.359 | 0.619 | 0.399 | 0.410 | 0.35  |
| 1n55   | 45     | 0.418      | 0.251 | 0.579 | 0.345 | 0.304 | 0.33  |
| 1nki   | 63     | 0.406      | 0.27  | 0.514 | 0.271 | 0.282 | 0.282 |
| 1nls   | 137    | 0.382      | 0.33  | 0.668 | 0.477 | 0.420 | 0.333 |
| 1nwz   | 25     | 0.371      | 0.262 | 0.627 | 0.468 | 0.336 | 0.371 |
| 1o7j   | 593    | 0.419      | 0.332 | 0.7   | 0.37  | 0.401 | 0.356 |
| 1oai   | 6      | 0.456      | 0.356 | 0.424 | 0.29  | 0.336 | 0.441 |
| 1od3   | 20     | 0.446      | 0.265 | 0.61  | 0.357 | 0.305 | 0.405 |
| 1ok0   | 17     | 0.405      | 0.272 | 0.387 | 0.41  | 0.280 | 0.31  |
| 1pq7   | 35     | 0.419      | 0.249 | 0.559 | 0.355 | 0.318 | 0.304 |
| 1r2m   | 0      | 0          | 0     | 0     | 0     | 0.000 | 0     |
| 1r6j   | 3      | 0.459      | 0.248 | 0.633 | 0.38  | 0.245 | 0.281 |
| 1rb9   | 8      | 0.418      | 0.183 | 0.432 | 0.395 | 0.297 | 0.308 |
| 1rtq   | 114    | 0.386      | 0.295 | 0.612 | 0.439 | 0.353 | 0.339 |
| 1sfd   | 81     | 0.353      | 0.241 | 0.495 | 0.183 | 0.200 | 0.133 |
| 1ssx   | 33     | 0.406      | 0.262 | 0.548 | 0.376 | 0.297 | 0.297 |
| 1tg0   | 25     | 0.368      | 0.281 | 0.607 | 0.513 | 0.311 | 0.38  |
| 1tqg   | 19     | 0.346      | 0.312 | 0.558 | 0.392 | 0.259 | 0.355 |
| 1tt8   | 71     | 0.407      | 0.27  | 0.634 | 0.481 | 0.341 | 0.362 |
| 1u2h   | 12     | 0.449      | 0.239 | 0.418 | 0.362 | 0.283 | 0.316 |
| 1ufy   | 33     | 0.383      | 0.27  | 0.516 | 0.37  | 0.283 | 0.325 |
| 1ug6   | 96     | 0.446      | 0.311 | 0.613 | 0.402 | 0.382 | 0.345 |
| 1unq   | 18     | 0.392      | 0.208 | 0.38  | 0.32  | 0.215 | 0.246 |

|      |     |       |       |       |       |       |       |
|------|-----|-------|-------|-------|-------|-------|-------|
| 1us0 | 91  | 0.386 | 0.323 | 0.595 | 0.379 | 0.367 | 0.346 |
| 1v0l | 61  | 0.433 | 0.349 | 0.622 | 0.438 | 0.380 | 0.395 |
| 1v6p | 9   | 0.378 | 0.149 | 0.477 | 0.293 | 0.262 | 0.244 |
| 1vbw | 14  | 0.386 | 0.29  | 0.403 | 0.441 | 0.300 | 0.367 |
| 1vyr | 127 | 0.396 | 0.32  | 0.594 | 0.343 | 0.312 | 0.343 |
| 1vyy | 3   | 0.469 | 0.235 | 0.533 | 0.405 | 0.304 | 0.341 |
| 1w0n | 30  | 0.441 | 0.204 | 0.588 | 0.397 | 0.271 | 0.288 |
| 1x6z | 0   | 0     | 0     | 0     | 0     | 0.000 | 0     |
| 1x8q | 41  | 0.382 | 0.261 | 0.557 | 0.396 | 0.309 | 0.334 |
| 1xmk | 21  | 0.409 | 0.283 | 0.483 | 0.401 | 0.319 | 0.361 |
| 1y55 | 0   | 0     | 0     | 0     | 0     | 0.000 | 0     |
| 1y1j | 56  | 0.417 | 0.276 | 0.566 | 0.404 | 0.324 | 0.343 |
| 1zk4 | 0   | 0     | 0     | 0     | 0     | 0.000 | 0     |
| 1zzk | 19  | 0.372 | 0.245 | 0.424 | 0.416 | 0.244 | 0.309 |
| 2bt9 | 74  | 0.399 | 0.25  | 0.594 | 0.306 | 0.254 | 0.252 |
| 2bw4 | 28  | 0.41  | 0.144 | 0.307 | 0.171 | 0.003 | 0.273 |
| 2cws | 76  | 0.384 | 0.32  | 0.572 | 0.377 | 0.304 | 0.305 |
| 2f01 | 73  | 0.413 | 0.248 | 0.573 | 0.355 | 0.292 | 0.263 |
| 2fdn | 5   | 0.398 | 0.338 | 0.539 | 0.442 | 0.436 | 0.368 |
| 2pvb | 15  | 0.444 | 0.237 | 0.601 | 0.408 | 0.280 | 0.373 |
| 3lzt | 37  | 0.398 | 0.302 | 0.551 | 0.432 | 0.315 | 0.321 |
| 7a3h | 0   | 0     | 0     | 0     | 0     | 0.000 | 0     |

Table VI: Average dot product by structure (P-values for hypothesis that prediction is no better from random).

| PDB ID | number | HCA                | ANM                | EIN                | DNM                | BNM                |
|--------|--------|--------------------|--------------------|--------------------|--------------------|--------------------|
| 1a6m   | 44     | 0.529 ( 2.66E-01 ) | 0.441 ( 9.04E-01 ) | 0.463 ( 7.85E-01 ) | 0.548 ( 1.55E-01 ) | 0.612 ( 3.97E-03 ) |
| 1byi   | 37     | 0.69 ( 6.72E-05 )  | 0.601 ( 1.71E-02 ) | 0.689 ( 1.18E-04 ) | 0.710 ( 4.11E-06 ) | 0.694 ( 3.43E-05 ) |
| 1c75   | 21     | 0.623 ( 3.42E-02 ) | 0.53 ( 3.47E-01 )  | 0.399 ( 9.41E-01 ) | 0.546 ( 2.67E-01 ) | 0.655 ( 2.53E-02 ) |
| 1c7k   | 41     | 0.506 ( 4.57E-01 ) | 0.627 ( 2.86E-03 ) | 0.702 ( 1.39E-05 ) | 0.637 ( 3.33E-03 ) | 0.564 ( 9.72E-02 ) |
| 1ea7   | 150    | 0.577 ( 1.64E-03 ) | 0.639 ( 1.03E-07 ) | 0.649 ( 1.37E-09 ) | 0.656 ( 5.89E-10 ) | 0.595 ( 8.97E-05 ) |
| 1eb6   | 4      | 0.754 ( 4.54E-02 ) | 0.604 ( 2.24E-01 ) | 0.822 ( 6.63E-03 ) | 0.758 ( 1.12E-01 ) | 0.729 ( 7.71E-02 ) |
| 1exr   | 39     | 0.588 ( 3.04E-02 ) | 0.684 ( 1.69E-05 ) | 0.74 ( 5.22E-08 )  | 0.766 ( 1.60E-09 ) | 0.573 ( 6.05E-02 ) |
| 1f94   | 0      | 0 ( 1.00E+00 )     | 0 ( 1.00E+00 )     | 0 ( 1.00E+00 )     | 0.000 ( 1.00E+00 ) | 0 ( 1.00E+00 )     |
| 1f9y   | 42     | 0.487 ( 6.00E-01 ) | 0.466 ( 7.78E-01 ) | 0.565 ( 1.02E-01 ) | 0.534 ( 2.44E-01 ) | 0.592 ( 2.41E-02 ) |
| 1g4i   | 17     | 0.718 ( 2.62E-03 ) | 0.624 ( 9.13E-02 ) | 0.741 ( 2.21E-03 ) | 0.819 ( 1.64E-05 ) | 0.858 ( 9.02E-08 ) |
| 1g66   | 65     | 0.694 ( 2.25E-07 ) | 0.52 ( 2.97E-01 )  | 0.632 ( 1.90E-04 ) | 0.625 ( 7.51E-04 ) | 0.677 ( 5.88E-06 ) |
| 1g6x   | 7      | 0.689 ( 2.52E-02 ) | 0.799 ( 2.29E-03 ) | 0.854 ( 6.86E-05 ) | 0.804 ( 2.83E-03 ) | 0.854 ( 8.26E-04 ) |
| 1ga6   | 131    | 0.586 ( 3.92E-04 ) | 0.604 ( 6.28E-05 ) | 0.753 ( 1.89E-21 ) | 0.709 ( 1.67E-14 ) | 0.697 ( 4.80E-15 ) |
| 1gkm   | 250    | 0.65 ( 1.08E-16 )  | 0.567 ( 5.13E-05 ) | 0.718 ( 2.48E-31 ) | 0.746 ( 3.44E-41 ) | 0.673 ( 4.49E-19 ) |
| 1gqv   | 32     | 0.611 ( 3.79E-02 ) | 0.675 ( 1.66E-03 ) | 0.839 ( 5.97E-10 ) | 0.833 ( 5.47E-11 ) | 0.811 ( 7.28E-09 ) |
| 1gvk   | 38     | 0.578 ( 9.00E-02 ) | 0.622 ( 1.82E-02 ) | 0.636 ( 5.06E-03 ) | 0.664 ( 9.04E-04 ) | 0.633 ( 1.08E-03 ) |
| 1gwe   | 93     | 0.634 ( 7.16E-06 ) | 0.616 ( 1.11E-04 ) | 0.69 ( 1.24E-12 )  | 0.645 ( 9.65E-09 ) | 0.584 ( 2.27E-03 ) |
| 1hj9   | 28     | 0.678 ( 4.05E-03 ) | 0.683 ( 5.47E-04 ) | 0.716 ( 3.23E-04 ) | 0.772 ( 1.49E-06 ) | 0.726 ( 4.67E-04 ) |
| 1ilw   | 67     | 0.624 ( 6.11E-04 ) | 0.493 ( 5.68E-01 ) | 0.629 ( 1.10E-04 ) | 0.650 ( 4.72E-05 ) | 0.619 ( 7.10E-04 ) |
| 1iqz   | 23     | 0.609 ( 5.52E-02 ) | 0.692 ( 1.95E-03 ) | 0.707 ( 1.18E-03 ) | 0.738 ( 8.67E-04 ) | 0.675 ( 3.64E-03 ) |
| 1iua   | 17     | 0.497 ( 5.18E-01 ) | 0.493 ( 5.39E-01 ) | 0.457 ( 7.04E-01 ) | 0.638 ( 2.65E-02 ) | 0.623 ( 5.46E-02 ) |
| 1ix9   | 222    | 0.519 ( 1.79E-01 ) | 0.533 ( 5.03E-02 ) | 0.577 ( 1.20E-05 ) | 0.617 ( 3.91E-11 ) | 0.562 ( 7.30E-04 ) |
| 1ixh   | 126    | 0.494 ( 5.82E-01 ) | 0.486 ( 6.96E-01 ) | 0.548 ( 4.81E-02 ) | 0.503 ( 4.54E-01 ) | 0.575 ( 6.01E-03 ) |
| 1j0p   | 30     | 0.526 ( 3.31E-01 ) | 0.668 ( 1.37E-03 ) | 0.733 ( 5.79E-06 ) | 0.681 ( 3.11E-04 ) | 0.765 ( 1.59E-06 ) |
| 1jfb   | 97     | 0.629 ( 2.21E-05 ) | 0.592 ( 2.25E-03 ) | 0.721 ( 4.04E-12 ) | 0.718 ( 3.09E-11 ) | 0.745 ( 6.79E-14 ) |
| 1k5c   | 9      | 0.616 ( 1.54E-01 ) | 0.661 ( 8.59E-02 ) | 0.553 ( 3.10E-01 ) | 0.683 ( 5.68E-02 ) | 0.622 ( 7.60E-02 ) |
| 1kth   | 5      | 0.632 ( 2.20E-01 ) | 0.643 ( 9.35E-02 ) | 0.747 ( 5.77E-02 ) | 0.733 ( 6.31E-02 ) | 0.826 ( 1.31E-02 ) |
| 1kwf   | 72     | 0.704 ( 2.24E-08 ) | 0.596 ( 3.19E-03 ) | 0.666 ( 3.60E-06 ) | 0.659 ( 1.15E-05 ) | 0.7 ( 8.69E-09 )   |
| 1l9l   | 4      | 0.634 ( 2.27E-01 ) | 0.387 ( 6.92E-01 ) | 0.615 ( 1.52E-01 ) | 0.790 ( 3.36E-04 ) | 0.438 ( 6.34E-01 ) |
| 1lkk   | 24     | 0.579 ( 9.68E-02 ) | 0.533 ( 2.87E-01 ) | 0.471 ( 6.73E-01 ) | 0.600 ( 4.00E-02 ) | 0.606 ( 3.87E-02 ) |
| 1lni   | 68     | 0.603 ( 6.65E-04 ) | 0.502 ( 4.82E-01 ) | 0.643 ( 1.74E-05 ) | 0.597 ( 4.44E-03 ) | 0.573 ( 1.51E-02 ) |
| 1lug   | 112    | 0.549 ( 4.99E-02 ) | 0.538 ( 9.78E-02 ) | 0.622 ( 2.84E-05 ) | 0.626 ( 8.60E-06 ) | 0.659 ( 8.15E-08 ) |
| 1mlq   | 24     | 0.453 ( 8.28E-01 ) | 0.758 ( 1.08E-05 ) | 0.765 ( 3.27E-05 ) | 0.702 ( 7.91E-04 ) | 0.672 ( 5.71E-03 ) |
| 1m40   | 6      | 0.515 ( 4.53E-01 ) | 0.692 ( 5.99E-02 ) | 0.557 ( 3.53E-01 ) | 0.607 ( 2.51E-01 ) | 0.609 ( 1.96E-01 ) |
| 1mc2   | 44     | 0.747 ( 2.52E-08 ) | 0.616 ( 7.17E-03 ) | 0.758 ( 1.66E-09 ) | 0.787 ( 2.54E-11 ) | 0.746 ( 2.85E-09 ) |
| 1mj5   | 176    | 0.502 ( 4.68E-01 ) | 0.513 ( 2.76E-01 ) | 0.476 ( 8.64E-01 ) | 0.488 ( 6.91E-01 ) | 0.549 ( 1.69E-02 ) |
| 1muw   | 102    | 0.599 ( 9.48E-04 ) | 0.468 ( 8.79E-01 ) | 0.611 ( 9.10E-05 ) | 0.600 ( 4.99E-04 ) | 0.616 ( 3.55E-05 ) |
| 1mwq   | 43     | 0.719 ( 2.98E-06 ) | 0.599 ( 2.97E-02 ) | 0.846 ( 3.62E-15 ) | 0.774 ( 1.82E-08 ) | 0.826 ( 6.43E-13 ) |
| 1n4w   | 98     | 0.607 ( 2.23E-04 ) | 0.626 ( 7.71E-05 ) | 0.608 ( 5.64E-04 ) | 0.681 ( 2.34E-10 ) | 0.665 ( 1.49E-08 ) |
| 1n55   | 45     | 0.649 ( 1.65E-04 ) | 0.634 ( 3.59E-03 ) | 0.748 ( 7.28E-08 ) | 0.750 ( 4.60E-08 ) | 0.744 ( 2.92E-07 ) |
| 1nki   | 63     | 0.65 ( 8.99E-05 )  | 0.61 ( 4.38E-03 )  | 0.725 ( 7.10E-09 ) | 0.748 ( 1.35E-11 ) | 0.734 ( 6.01E-11 ) |
| 1nls   | 137    | 0.65 ( 9.00E-09 )  | 0.532 ( 1.24E-01 ) | 0.662 ( 2.63E-10 ) | 0.643 ( 7.46E-08 ) | 0.71 ( 2.76E-15 )  |
| 1nwz   | 25     | 0.616 ( 4.45E-02 ) | 0.439 ( 9.03E-01 ) | 0.634 ( 1.40E-02 ) | 0.600 ( 7.47E-02 ) | 0.663 ( 3.72E-03 ) |
| 1o7j   | 593    | 0.53 ( 9.22E-03 )  | 0.553 ( 1.24E-05 ) | 0.602 ( 3.66E-16 ) | 0.598 ( 2.86E-15 ) | 0.613 ( 2.48E-19 ) |
| 1oai   | 6      | 0.698 ( 7.59E-02 ) | 0.45 ( 6.30E-01 )  | 0.648 ( 2.03E-02 ) | 0.550 ( 3.18E-01 ) | 0.833 ( 5.43E-03 ) |
| 1od3   | 20     | 0.519 ( 3.99E-01 ) | 0.599 ( 1.15E-01 ) | 0.78 ( 1.77E-05 )  | 0.683 ( 4.49E-03 ) | 0.702 ( 1.08E-03 ) |
| 1ok0   | 17     | 0.723 ( 1.81E-03 ) | 0.566 ( 2.00E-01 ) | 0.538 ( 3.22E-01 ) | 0.623 ( 6.31E-02 ) | 0.595 ( 1.52E-01 ) |
| 1pq7   | 35     | 0.727 ( 7.45E-06 ) | 0.632 ( 3.83E-03 ) | 0.663 ( 1.57E-03 ) | 0.768 ( 3.12E-07 ) | 0.708 ( 2.98E-06 ) |
| 1r2m   | 0      | 0 ( 1.00E+00 )     | 0 ( 1.00E+00 )     | 0 ( 1.00E+00 )     | 0.000 ( 1.00E+00 ) | 0 ( 1.00E+00 )     |
| 1r6j   | 3      | 0.639 ( 1.61E-01 ) | 0.933 ( 9.74E-05 ) | 0.862 ( 2.31E-02 ) | 0.945 ( 9.11E-04 ) | 0.936 ( 1.44E-03 ) |
| 1rb9   | 8      | 0.381 ( 8.59E-01 ) | 0.639 ( 1.74E-01 ) | 0.752 ( 8.57E-03 ) | 0.651 ( 6.62E-02 ) | 0.535 ( 3.50E-01 ) |
| 1rtq   | 114    | 0.605 ( 1.23E-04 ) | 0.568 ( 1.22E-02 ) | 0.589 ( 1.85E-03 ) | 0.625 ( 7.85E-06 ) | 0.63 ( 3.21E-06 )  |
| 1sfd   | 81     | 0.593 ( 1.19E-03 ) | 0.571 ( 2.41E-02 ) | 0.748 ( 3.04E-16 ) | 0.667 ( 1.01E-06 ) | 0.643 ( 4.89E-06 ) |
| 1ssx   | 33     | 0.715 ( 4.59E-06 ) | 0.576 ( 8.87E-02 ) | 0.63 ( 6.95E-03 )  | 0.760 ( 1.67E-06 ) | 0.742 ( 4.93E-07 ) |
| 1tg0   | 25     | 0.591 ( 6.19E-02 ) | 0.563 ( 1.34E-01 ) | 0.61 ( 1.60E-02 )  | 0.639 ( 5.86E-03 ) | 0.603 ( 5.07E-02 ) |
| 1tqg   | 19     | 0.685 ( 1.21E-02 ) | 0.719 ( 1.63E-03 ) | 0.537 ( 2.99E-01 ) | 0.569 ( 1.37E-01 ) | 0.463 ( 7.25E-01 ) |
| 1tt8   | 71     | 0.708 ( 2.30E-08 ) | 0.584 ( 9.01E-03 ) | 0.646 ( 1.02E-05 ) | 0.729 ( 1.06E-10 ) | 0.707 ( 1.57E-09 ) |
| 1u2h   | 12     | 0.516 ( 4.33E-01 ) | 0.635 ( 2.66E-02 ) | 0.638 ( 7.60E-02 ) | 0.487 ( 5.56E-01 ) | 0.686 ( 2.52E-02 ) |
| 1ufy   | 33     | 0.76 ( 5.12E-07 )  | 0.677 ( 5.57E-04 ) | 0.747 ( 1.18E-06 ) | 0.797 ( 2.92E-10 ) | 0.816 ( 8.29E-12 ) |

|      |     |                    |                    |                    |                    |                    |
|------|-----|--------------------|--------------------|--------------------|--------------------|--------------------|
| lug6 | 96  | 0.678 ( 1.57E-08 ) | 0.592 ( 3.82E-03 ) | 0.71 ( 7.57E-12 )  | 0.651 ( 1.32E-07 ) | 0.704 ( 2.44E-12 ) |
| lunq | 18  | 0.734 ( 4.22E-04 ) | 0.523 ( 4.02E-01 ) | 0.818 ( 4.54E-06 ) | 0.794 ( 5.26E-06 ) | 0.713 ( 5.12E-03 ) |
| lus0 | 91  | 0.575 ( 9.73E-03 ) | 0.531 ( 1.64E-01 ) | 0.552 ( 6.15E-02 ) | 0.578 ( 6.97E-03 ) | 0.717 ( 7.86E-12 ) |
| lv0l | 61  | 0.631 ( 1.14E-03 ) | 0.445 ( 9.34E-01 ) | 0.6 ( 7.26E-03 )   | 0.556 ( 8.85E-02 ) | 0.672 ( 7.53E-06 ) |
| lv6p | 9   | 0.695 ( 4.26E-02 ) | 0.661 ( 6.58E-02 ) | 0.605 ( 1.12E-01 ) | 0.670 ( 4.30E-02 ) | 0.623 ( 1.48E-01 ) |
| lvbw | 14  | 0.591 ( 1.33E-01 ) | 0.427 ( 8.25E-01 ) | 0.57 ( 1.91E-01 )  | 0.569 ( 2.31E-01 ) | 0.689 ( 5.82E-03 ) |
| lvyr | 127 | 0.631 ( 2.34E-06 ) | 0.554 ( 2.31E-02 ) | 0.665 ( 8.02E-09 ) | 0.712 ( 4.66E-15 ) | 0.716 ( 4.39E-17 ) |
| lvyy | 3   | 0.735 ( 1.54E-01 ) | 0.559 ( 3.73E-01 ) | 0.577 ( 3.71E-01 ) | 0.551 ( 4.23E-01 ) | 0.755 ( 4.20E-03 ) |
| lw0n | 30  | 0.617 ( 2.67E-02 ) | 0.623 ( 1.60E-02 ) | 0.623 ( 1.80E-02 ) | 0.649 ( 1.01E-02 ) | 0.72 ( 6.89E-05 )  |
| lx6z | 0   | 0 ( 1.00E+00 )     | 0 ( 1.00E+00 )     | 0 ( 1.00E+00 )     | 0.000 ( 1.00E+00 ) | 0 ( 1.00E+00 )     |
| lx8q | 41  | 0.682 ( 2.36E-04 ) | 0.62 ( 3.72E-03 )  | 0.624 ( 1.16E-02 ) | 0.649 ( 1.32E-03 ) | 0.7 ( 3.18E-05 )   |
| lxmk | 21  | 0.613 ( 4.49E-02 ) | 0.601 ( 3.92E-02 ) | 0.717 ( 1.75E-04 ) | 0.718 ( 2.06E-04 ) | 0.713 ( 1.03E-04 ) |
| ly55 | 0   | 0 ( 1.00E+00 )     | 0 ( 1.00E+00 )     | 0 ( 1.00E+00 )     | 0.000 ( 1.00E+00 ) | 0 ( 1.00E+00 )     |
| lylj | 56  | 0.656 ( 3.54E-04 ) | 0.552 ( 1.20E-01 ) | 0.676 ( 1.65E-05 ) | 0.771 ( 1.58E-12 ) | 0.74 ( 8.65E-09 )  |
| lzk4 | 0   | 0 ( 1.00E+00 )     | 0 ( 1.00E+00 )     | 0 ( 1.00E+00 )     | 0.000 ( 1.00E+00 ) | 0 ( 1.00E+00 )     |
| lzzk | 19  | 0.62 ( 3.77E-02 )  | 0.538 ( 3.01E-01 ) | 0.505 ( 4.69E-01 ) | 0.648 ( 2.32E-02 ) | 0.858 ( 3.49E-08 ) |
| 2bt9 | 74  | 0.613 ( 6.43E-04 ) | 0.584 ( 1.11E-02 ) | 0.774 ( 4.26E-15 ) | 0.703 ( 2.20E-09 ) | 0.729 ( 6.82E-13 ) |
| 2bw4 | 28  | 0.729 ( 5.94E-06 ) | 0.458 ( 7.45E-01 ) | 0.486 ( 5.91E-01 ) | 0.511 ( 4.29E-01 ) | 0.638 ( 1.08E-02 ) |
| 2cws | 76  | 0.657 ( 1.41E-05 ) | 0.619 ( 5.81E-04 ) | 0.747 ( 1.43E-12 ) | 0.759 ( 4.47E-15 ) | 0.68 ( 3.02E-08 )  |
| 2f01 | 73  | 0.669 ( 5.52E-07 ) | 0.499 ( 5.14E-01 ) | 0.511 ( 3.83E-01 ) | 0.587 ( 5.30E-03 ) | 0.652 ( 1.79E-06 ) |
| 2fdn | 5   | 0.413 ( 9.03E-01 ) | 0.484 ( 5.46E-01 ) | 0.516 ( 4.62E-01 ) | 0.658 ( 1.19E-01 ) | 0.432 ( 6.58E-01 ) |
| 2pvb | 15  | 0.709 ( 2.83E-03 ) | 0.587 ( 1.70E-01 ) | 0.75 ( 5.55E-04 )  | 0.746 ( 1.02E-03 ) | 0.813 ( 1.19E-05 ) |
| 3lzt | 37  | 0.58 ( 3.33E-02 )  | 0.533 ( 2.58E-01 ) | 0.55 ( 1.59E-01 )  | 0.611 ( 4.16E-03 ) | 0.529 ( 2.82E-01 ) |
| 7a3h | 0   | 0 ( 1.00E+00 )     | 0 ( 1.00E+00 )     | 0 ( 1.00E+00 )     | 0.000 ( 1.00E+00 ) | 0 ( 1.00E+00 )     |

Table VII: Average overlap fraction by structure (P-values for hypothesis that prediction is no better from random).

| PDB ID | number | HCA   |            | ANM   |            | EIN   |             | DNM   |             | BNM   |             |
|--------|--------|-------|------------|-------|------------|-------|-------------|-------|-------------|-------|-------------|
| 1a6m   | 44     | 0.484 | (6.26E-09) | 0.53  | (1.10E-07) | 0.476 | (6.27E-06)  | 0.500 | (2.25E-07)  | 0.598 | (3.64E-13)  |
| 1byi   | 37     | 0.572 | (7.57E-10) | 0.546 | (3.89E-07) | 0.631 | (8.62E-13)  | 0.621 | (3.66E-12)  | 0.625 | (4.21E-12)  |
| 1c75   | 21     | 0.445 | (6.01E-03) | 0.499 | (7.87E-04) | 0.342 | (1.72E-01)  | 0.427 | (1.20E-02)  | 0.565 | (2.59E-05)  |
| 1c7k   | 41     | 0.422 | (1.18E-03) | 0.568 | (8.65E-10) | 0.59  | (1.75E-10)  | 0.543 | (4.19E-09)  | 0.543 | (7.63E-09)  |
| 1ea7   | 150    | 0.535 | (1.88E-24) | 0.547 | (1.12E-27) | 0.605 | (8.11E-35)  | 0.614 | (4.57E-36)  | 0.568 | (1.24E-30)  |
| 1eb6   | 4      | 0.662 | (1.13E-02) | 0.882 | (3.08E-05) | 0.74  | (1.47E-03)  | 0.736 | (4.01E-03)  | 0.684 | (1.39E-02)  |
| 1exr   | 39     | 0.399 | (1.26E-03) | 0.397 | (5.82E-04) | 0.415 | (1.51E-04)  | 0.374 | (5.96E-03)  | 0.569 | (3.35E-09)  |
| 1f94   | 0      | 0     | (1.00E+00) | 0     | (1.00E+00) | 0     | (1.00E+00)  | 0.000 | (1.00E+00)  | 0     | (1.00E+00)  |
| 1f9y   | 42     | 0.443 | (2.51E-04) | 0.414 | (9.72E-04) | 0.488 | (2.15E-06)  | 0.465 | (4.44E-05)  | 0.521 | (2.48E-09)  |
| 1g4i   | 17     | 0.535 | (4.83E-04) | 0.726 | (1.02E-06) | 0.738 | (9.88E-10)  | 0.705 | (2.20E-07)  | 0.773 | (3.22E-08)  |
| 1g66   | 65     | 0.592 | (1.83E-16) | 0.532 | (4.99E-14) | 0.566 | (2.22E-13)  | 0.583 | (8.69E-17)  | 0.618 | (8.58E-19)  |
| 1g6x   | 7      | 0.496 | (6.94E-03) | 0.778 | (1.05E-05) | 0.708 | (5.64E-05)  | 0.630 | (6.32E-04)  | 0.721 | (1.01E-04)  |
| 1ga6   | 131    | 0.515 | (5.08E-24) | 0.609 | (4.46E-34) | 0.699 | (3.10E-54)  | 0.657 | (2.23E-46)  | 0.661 | (1.41E-49)  |
| 1gkm   | 250    | 0.519 | (1.96E-43) | 0.527 | (2.15E-43) | 0.583 | (1.13E-63)  | 0.589 | (3.65E-68)  | 0.608 | (9.10E-68)  |
| 1gqv   | 32     | 0.524 | (1.29E-05) | 0.733 | (2.52E-12) | 0.745 | (1.85E-17)  | 0.678 | (2.11E-17)  | 0.716 | (4.69E-18)  |
| 1gvk   | 38     | 0.588 | (5.45E-14) | 0.717 | (1.46E-17) | 0.709 | (2.72E-17)  | 0.683 | (7.27E-17)  | 0.663 | (2.62E-15)  |
| 1gwe   | 93     | 0.538 | (2.24E-24) | 0.543 | (4.44E-24) | 0.201 | (1.00E+00)  | 0.213 | (1.00E+00)  | 0.524 | (2.11E-22)  |
| 1hj9   | 28     | 0.558 | (7.68E-09) | 0.671 | (2.09E-10) | 0.647 | (9.51E-12)  | 0.616 | (1.07E-13)  | 0.655 | (2.74E-12)  |
| 1ilw   | 67     | 0.528 | (1.77E-11) | 0.59  | (2.17E-16) | 0.598 | (1.86E-18)  | 0.580 | (3.70E-15)  | 0.586 | (5.63E-16)  |
| 1iqz   | 23     | 0.511 | (2.88E-04) | 0.762 | (1.77E-12) | 0.646 | (2.46E-06)  | 0.661 | (2.52E-06)  | 0.607 | (2.16E-06)  |
| 1iua   | 17     | 0.435 | (4.97E-03) | 0.483 | (5.78E-04) | 0.422 | (1.08E-02)  | 0.462 | (6.84E-04)  | 0.494 | (1.49E-03)  |
| 1ix9   | 222    | 0.462 | (9.79E-22) | 0.491 | (3.08E-28) | 0.566 | (2.68E-54)  | 0.579 | (7.05E-60)  | 0.556 | (1.02E-45)  |
| 1lixh  | 126    | 0.529 | (3.68E-23) | 0.523 | (1.03E-21) | 0.561 | (1.64E-26)  | 0.559 | (1.71E-26)  | 0.613 | (8.59E-32)  |
| 1j0p   | 30     | 0.399 | (4.59E-03) | 0.564 | (3.21E-07) | 0.612 | (3.76E-11)  | 0.574 | (2.65E-10)  | 0.667 | (5.11E-13)  |
| 1jfb   | 97     | 0.53  | (2.68E-19) | 0.605 | (2.07E-24) | 0.65  | (2.95E-40)  | 0.652 | (2.05E-40)  | 0.663 | (1.04E-39)  |
| 1k5c   | 9      | 0.54  | (4.48E-03) | 0.658 | (9.74E-05) | 0.547 | (7.52E-03)  | 0.642 | (1.45E-05)  | 0.603 | (5.01E-04)  |
| 1kth   | 5      | 0.508 | (8.96E-02) | 0.616 | (7.03E-03) | 0.681 | (3.62E-03)  | 0.715 | (9.17E-04)  | 0.642 | (1.80E-02)  |
| 1kwf   | 72     | 0.589 | (2.52E-20) | 0.499 | (9.24E-09) | 0.628 | (9.59E-24)  | 0.573 | (7.82E-16)  | 0.663 | (1.73E-27)  |
| 1l9l   | 4      | 0.372 | (2.38E-01) | 0.651 | (6.53E-04) | 0.516 | (5.14E-03)  | 0.478 | (9.89E-03)  | 0.33  | (4.25E-01)  |
| 1llk   | 24     | 0.393 | (1.80E-02) | 0.412 | (1.22E-02) | 0.396 | (4.48E-02)  | 0.525 | (8.46E-06)  | 0.564 | (5.00E-07)  |
| 1lni   | 68     | 0.514 | (1.71E-17) | 0.588 | (5.06E-16) | 0.434 | (8.44E-09)  | 0.467 | (9.13E-13)  | 0.41  | (1.74E-08)  |
| 1llug  | 112    | 0.463 | (1.35E-14) | 0.521 | (1.28E-18) | 0.614 | (4.49E-30)  | 0.587 | (3.04E-30)  | 0.622 | (1.54E-33)  |
| 1mlq   | 24     | 0.328 | (2.17E-01) | 0.685 | (5.51E-12) | 0.661 | (1.78E-08)  | 0.622 | (1.56E-10)  | 0.65  | (6.83E-08)  |
| 1m40   | 6      | 0.467 | (1.08E-01) | 0.622 | (3.84E-03) | 0.581 | (2.65E-02)  | 0.678 | (9.16E-04)  | 0.713 | (4.65E-05)  |
| 1mc2   | 44     | 0.592 | (9.45E-13) | 0.688 | (5.24E-18) | 0.656 | (1.59E-19)  | 0.646 | (1.62E-18)  | 0.645 | (1.87E-18)  |
| 1mj5   | 176    | 0.459 | (1.66E-16) | 0.365 | (1.86E-05) | 0.423 | (4.11E-12)  | 0.461 | (3.73E-16)  | 0.506 | (6.68E-26)  |
| 1muw   | 102    | 0.545 | (3.15E-23) | 0.551 | (5.96E-22) | 0.471 | (1.75E-12)  | 0.400 | (6.40E-07)  | 0.498 | (1.30E-16)  |
| 1mwq   | 43     | 0.568 | (3.31E-09) | 0.749 | (2.67E-18) | 0.72  | (4.66E-18)  | 0.650 | (2.11E-14)  | 0.688 | (1.77E-22)  |
| 1n4w   | 98     | 0.543 | (2.66E-21) | 0.54  | (1.68E-16) | 0.568 | (1.70E-19)  | 0.594 | (7.10E-23)  | 0.633 | (7.16E-38)  |
| 1n55   | 45     | 0.561 | (1.06E-11) | 0.633 | (9.70E-15) | 0.721 | (8.47E-23)  | 0.654 | (1.43E-19)  | 0.686 | (3.59E-21)  |
| 1nki   | 63     | 0.54  | (5.73E-13) | 0.633 | (1.09E-14) | 0.666 | (4.90E-24)  | 0.636 | (2.09E-22)  | 0.665 | (1.33E-24)  |
| 1nls   | 137    | 0.577 | (7.53E-32) | 0.501 | (1.56E-22) | 0.609 | (1.86E-34)  | 0.601 | (4.64E-36)  | 0.684 | (8.33E-48)  |
| 1nwz   | 25     | 0.471 | (9.89E-04) | 0.412 | (6.72E-03) | 0.513 | (3.04E-05)  | 0.511 | (1.54E-04)  | 0.614 | (1.76E-07)  |
| 1o7j   | 593    | 0.504 | (6.96E-68) | 0.409 | (1.90E-27) | 0.601 | (6.61E-141) | 0.609 | (9.42E-145) | 0.585 | (6.87E-128) |
| 1oai   | 6      | 0.585 | (1.78E-03) | 0.7   | (3.54E-05) | 0.546 | (2.06E-03)  | 0.548 | (3.36E-03)  | 0.786 | (8.48E-05)  |
| 1od3   | 20     | 0.402 | (2.51E-02) | 0.597 | (4.10E-06) | 0.696 | (3.20E-10)  | 0.615 | (6.97E-09)  | 0.655 | (2.68E-07)  |
| 1ok0   | 17     | 0.558 | (4.90E-05) | 0.599 | (5.89E-05) | 0.6   | (3.59E-06)  | 0.612 | (2.32E-05)  | 0.643 | (1.97E-06)  |
| 1pq7   | 35     | 0.545 | (2.10E-10) | 0.598 | (3.92E-11) | 0.63  | (4.11E-13)  | 0.660 | (1.05E-15)  | 0.66  | (3.89E-17)  |
| 1r2m   | 0      | 0     | (1.00E+00) | 0     | (1.00E+00) | 0     | (1.00E+00)  | 0.000 | (1.00E+00)  | 0     | (1.00E+00)  |
| 1r6j   | 3      | 0.504 | (1.41E-02) | 0.687 | (2.14E-02) | 0.829 | (2.36E-03)  | 0.762 | (5.48E-03)  | 0.76  | (7.22E-03)  |
| 1rb9   | 8      | 0.521 | (1.60E-04) | 0.84  | (6.15E-07) | 0.842 | (1.69E-07)  | 0.697 | (2.72E-05)  | 0.7   | (1.23E-04)  |
| 1rtq   | 114    | 0.522 | (8.86E-21) | 0.543 | (8.92E-22) | 0.592 | (2.19E-26)  | 0.573 | (1.05E-26)  | 0.623 | (2.86E-33)  |
| 1sfd   | 81     | 0.491 | (1.87E-15) | 0.58  | (7.45E-19) | 0.585 | (2.28E-26)  | 0.597 | (3.92E-24)  | 0.501 | (3.10E-16)  |
| 1ssx   | 33     | 0.665 | (1.64E-16) | 0.62  | (3.34E-09) | 0.61  | (6.59E-10)  | 0.682 | (2.54E-15)  | 0.681 | (6.48E-14)  |
| 1tg0   | 25     | 0.453 | (1.39E-04) | 0.513 | (9.45E-05) | 0.531 | (3.57E-08)  | 0.548 | (2.65E-06)  | 0.504 | (2.76E-04)  |
| 1tqg   | 19     | 0.7   | (2.98E-08) | 0.548 | (3.84E-08) | 0.54  | (1.95E-04)  | 0.654 | (7.47E-10)  | 0.622 | (1.10E-06)  |
| 1tt8   | 71     | 0.563 | (5.21E-16) | 0.555 | (1.46E-17) | 0.573 | (2.07E-14)  | 0.597 | (1.23E-19)  | 0.588 | (7.30E-18)  |
| 1u2h   | 12     | 0.419 | (3.43E-02) | 0.487 | (9.49E-03) | 0.502 | (1.20E-02)  | 0.409 | (3.60E-02)  | 0.505 | (6.78E-03)  |
| 1ufy   | 33     | 0.64  | (4.47E-11) | 0.615 | (2.70E-11) | 0.7   | (3.18E-13)  | 0.689 | (1.29E-14)  | 0.693 | (9.57E-14)  |

|      |     |                    |                    |                    |                    |                    |
|------|-----|--------------------|--------------------|--------------------|--------------------|--------------------|
| lug6 | 96  | 0.556 ( 9.24E-25 ) | 0.578 ( 8.95E-22 ) | 0.658 ( 1.61E-34 ) | 0.578 ( 1.22E-23 ) | 0.648 ( 5.49E-37 ) |
| lunq | 18  | 0.555 ( 3.66E-05 ) | 0.669 ( 1.02E-06 ) | 0.746 ( 2.73E-09 ) | 0.660 ( 4.83E-09 ) | 0.692 ( 1.76E-08 ) |
| lus0 | 91  | 0.527 ( 2.91E-17 ) | 0.458 ( 6.70E-11 ) | 0.551 ( 3.69E-18 ) | 0.582 ( 1.18E-22 ) | 0.726 ( 1.60E-46 ) |
| lv0l | 61  | 0.549 ( 1.39E-11 ) | 0.51 ( 2.68E-09 )  | 0.587 ( 7.39E-16 ) | 0.542 ( 1.47E-14 ) | 0.649 ( 4.80E-26 ) |
| lv6p | 9   | 0.629 ( 8.22E-06 ) | 0.685 ( 5.39E-05 ) | 0.575 ( 1.22E-03 ) | 0.645 ( 6.92E-04 ) | 0.527 ( 5.46E-03 ) |
| lvbw | 14  | 0.461 ( 3.20E-03 ) | 0.556 ( 3.00E-05 ) | 0.541 ( 6.24E-04 ) | 0.599 ( 1.37E-05 ) | 0.659 ( 1.49E-06 ) |
| lvyr | 127 | 0.559 ( 3.95E-25 ) | 0.592 ( 3.27E-31 ) | 0.642 ( 1.30E-39 ) | 0.624 ( 1.07E-41 ) | 0.654 ( 1.69E-44 ) |
| lvyy | 3   | 0.482 ( 9.76E-02 ) | 0.519 ( 1.58E-01 ) | 0.49 ( 1.69E-01 )  | 0.382 ( 3.07E-01 ) | 0.624 ( 3.05E-02 ) |
| lw0n | 30  | 0.524 ( 4.30E-08 ) | 0.648 ( 6.58E-11 ) | 0.61 ( 2.75E-11 )  | 0.614 ( 5.02E-11 ) | 0.672 ( 5.11E-14 ) |
| lx6z | 0   | 0 ( 1.00E+00 )     | 0 ( 1.00E+00 )     | 0 ( 1.00E+00 )     | 0.000 ( 1.00E+00 ) | 0 ( 1.00E+00 )     |
| lx8q | 41  | 0.533 ( 3.38E-09 ) | 0.522 ( 4.27E-08 ) | 0.579 ( 3.98E-10 ) | 0.536 ( 4.47E-08 ) | 0.613 ( 2.80E-11 ) |
| lxmk | 21  | 0.517 ( 2.10E-07 ) | 0.637 ( 3.20E-08 ) | 0.628 ( 3.34E-09 ) | 0.618 ( 4.35E-08 ) | 0.602 ( 1.57E-08 ) |
| ly55 | 0   | 0 ( 1.00E+00 )     | 0 ( 1.00E+00 )     | 0 ( 1.00E+00 )     | 0.000 ( 1.00E+00 ) | 0 ( 1.00E+00 )     |
| lylj | 56  | 0.596 ( 2.52E-16 ) | 0.635 ( 2.12E-17 ) | 0.641 ( 6.78E-19 ) | 0.657 ( 1.20E-20 ) | 0.717 ( 4.89E-28 ) |
| lzk4 | 0   | 0 ( 1.00E+00 )     | 0 ( 1.00E+00 )     | 0 ( 1.00E+00 )     | 0.000 ( 1.00E+00 ) | 0 ( 1.00E+00 )     |
| lzzk | 19  | 0.509 ( 1.23E-04 ) | 0.554 ( 3.20E-06 ) | 0.483 ( 1.25E-05 ) | 0.544 ( 1.83E-05 ) | 0.716 ( 4.97E-10 ) |
| 2bt9 | 74  | 0.586 ( 1.16E-19 ) | 0.585 ( 9.87E-19 ) | 0.676 ( 2.32E-29 ) | 0.594 ( 1.15E-20 ) | 0.634 ( 1.14E-25 ) |
| 2bw4 | 28  | 0.493 ( 1.22E-08 ) | 0.504 ( 2.23E-05 ) | 0.456 ( 2.46E-04 ) | 0.041 ( 1.00E+00 ) | 0.545 ( 2.30E-09 ) |
| 2cws | 76  | 0.559 ( 7.69E-14 ) | 0.595 ( 4.94E-19 ) | 0.701 ( 4.03E-31 ) | 0.671 ( 8.43E-30 ) | 0.632 ( 2.18E-28 ) |
| 2f01 | 73  | 0.565 ( 3.75E-17 ) | 0.521 ( 3.45E-13 ) | 0.537 ( 2.59E-13 ) | 0.547 ( 9.54E-18 ) | 0.638 ( 1.47E-30 ) |
| 2fdn | 5   | 0.323 ( 4.00E-01 ) | 0.502 ( 3.60E-02 ) | 0.367 ( 2.87E-01 ) | 0.411 ( 1.70E-01 ) | 0.432 ( 8.19E-03 ) |
| 2pvb | 15  | 0.576 ( 1.68E-05 ) | 0.599 ( 1.03E-04 ) | 0.657 ( 1.85E-06 ) | 0.674 ( 4.97E-07 ) | 0.709 ( 7.88E-07 ) |
| 3lzt | 37  | 0.461 ( 2.15E-05 ) | 0.55 ( 1.11E-08 )  | 0.556 ( 9.57E-09 ) | 0.535 ( 1.72E-08 ) | 0.516 ( 3.11E-07 ) |
| 7a3h | 0   | 0 ( 1.00E+00 )     | 0 ( 1.00E+00 )     | 0 ( 1.00E+00 )     | 0.000 ( 1.00E+00 ) | 0 ( 1.00E+00 )     |

Table VIII: Isotropic correlation by structure (P-values for hypothesis that prediction is no better from random).

| PDB ID | number | HCA                | ANM                 | EIN                 | DNM                | BNM                 |
|--------|--------|--------------------|---------------------|---------------------|--------------------|---------------------|
| 1a6m   | 104    | 0.516 ( 1.07E-08 ) | 0.635 ( 2.25E-13 )  | 0.616 ( 1.72E-12 )  | 0.595 ( 1.35E-11 ) | 0.303 ( 8.77E-04 )  |
| 1byi   | 139    | 0.726 ( 2.55E-24 ) | 0.576 ( 6.17E-14 )  | 0.79 ( 3.47E-31 )   | 0.729 ( 1.27E-24 ) | 0.789 ( 4.32E-31 )  |
| 1c75   | 38     | 0.562 ( 1.21E-04 ) | 0.679 ( 1.42E-06 )  | 0.081 ( 3.15E-01 )  | 0.498 ( 7.24E-04 ) | 0.668 ( 2.30E-06 )  |
| 1c7k   | 85     | 0.62 ( 1.24E-10 )  | 0.626 ( 7.45E-11 )  | 0.555 ( 1.79E-08 )  | 0.606 ( 4.00E-10 ) | 0.51 ( 3.12E-07 )   |
| 1ea7   | 251    | 0.739 ( 6.63E-45 ) | 0.658 ( 7.08E-33 )  | 0.659 ( 6.06E-33 )  | 0.680 ( 1.01E-35 ) | 0.696 ( 5.77E-38 )  |
| 1eb6   | 125    | 0.728 ( 3.05E-22 ) | 0.758 ( 7.45E-25 )  | 0.666 ( 1.21E-17 )  | 0.713 ( 5.78E-21 ) | 0.4 ( 1.85E-06 )    |
| 1exr   | 55     | 0.782 ( 9.26E-13 ) | 0.413 ( 8.71E-04 )  | 0.313 ( 9.97E-03 )  | 0.422 ( 6.63E-04 ) | 0.81 ( 3.41E-14 )   |
| 1f94   | 23     | 0.835 ( 3.65E-07 ) | 0.467 ( 1.23E-02 )  | 0.844 ( 2.06E-07 )  | 0.782 ( 5.30E-06 ) | 0.675 ( 2.07E-04 )  |
| 1f9y   | 97     | 0.699 ( 8.90E-16 ) | 0.724 ( 2.83E-17 )  | 0.746 ( 9.77E-19 )  | 0.728 ( 1.50E-17 ) | 0.674 ( 1.87E-14 )  |
| 1g4i   | 61     | 0.507 ( 1.54E-05 ) | 0.783 ( 4.64E-14 )  | 0.732 ( 9.87E-12 )  | 0.753 ( 1.28E-12 ) | 0.616 ( 6.35E-08 )  |
| 1g66   | 145    | 0.677 ( 4.58E-21 ) | 0.702 ( 4.20E-23 )  | 0.728 ( 1.52E-25 )  | 0.769 ( 7.04E-30 ) | 0.728 ( 1.63E-25 )  |
| 1g6x   | 21     | 0.853 ( 4.57E-07 ) | 0.775 ( 1.85E-05 )  | 0.769 ( 2.29E-05 )  | 0.962 ( 1.84E-12 ) | 0.728 ( 9.30E-05 )  |
| 1ga6   | 315    | 0.827 ( 1.28E-80 ) | 0.788 ( 2.93E-68 )  | 0.889 ( 2.37E-108 ) | 0.844 ( 6.58E-87 ) | 0.754 ( 2.48E-59 )  |
| 1gkm   | 373    | 0.719 ( 6.65E-61 ) | 0.693 ( 5.69E-55 )  | 0.744 ( 3.60E-67 )  | 0.719 ( 8.38E-61 ) | 0.757 ( 7.00E-71 )  |
| 1gqv   | 71     | 0.59 ( 3.11E-08 )  | 0.737 ( 1.14E-13 )  | 0.821 ( 9.39E-19 )  | 0.734 ( 1.73E-13 ) | 0.794 ( 6.85E-17 )  |
| 1gvk   | 169    | 0.826 ( 1.21E-43 ) | 0.842 ( 6.80E-47 )  | 0.905 ( 5.00E-64 )  | 0.728 ( 1.57E-29 ) | 0.897 ( 2.02E-61 )  |
| 1gwe   | 301    | 0.462 ( 1.33E-17 ) | 0.55 ( 1.84E-25 )   | 0.569 ( 1.76E-27 )  | 0.606 ( 6.37E-32 ) | 0.654 ( 1.83E-38 )  |
| 1hj9   | 168    | 0.478 ( 2.90E-11 ) | 0.755 ( 1.55E-32 )  | 0.693 ( 1.26E-25 )  | 0.688 ( 3.81E-25 ) | 0.802 ( 2.67E-39 )  |
| 1ilw   | 238    | 0.631 ( 4.23E-28 ) | 0.723 ( 5.04E-40 )  | 0.75 ( 1.61E-44 )   | 0.686 ( 9.37E-35 ) | 0.663 ( 7.95E-32 )  |
| 1iqz   | 60     | 0.575 ( 7.75E-07 ) | 0.888 ( 1.65E-21 )  | 0.783 ( 7.63E-14 )  | 0.921 ( 9.28E-26 ) | 0.67 ( 2.40E-09 )   |
| 1iua   | 29     | 0.166 ( 1.94E-01 ) | 0.33 ( 4.03E-02 )   | 0.844 ( 4.47E-09 )  | 0.348 ( 3.22E-02 ) | 0.669 ( 3.60E-05 )  |
| 1ix9   | 331    | 0.701 ( 1.77E-50 ) | 0.71 ( 2.14E-52 )   | 0.708 ( 7.58E-52 )  | 0.720 ( 1.73E-54 ) | 0.698 ( 7.39E-50 )  |
| 1lixh  | 271    | 0.616 ( 5.17E-30 ) | 0.704 ( 3.02E-42 )  | 0.713 ( 1.25E-43 )  | 0.715 ( 4.98E-44 ) | 0.61 ( 2.65E-29 )   |
| 1j0p   | 71     | 0.36 ( 1.03E-03 )  | 0.413 ( 1.69E-04 )  | 0.455 ( 3.40E-05 )  | 0.611 ( 7.58E-09 ) | 0.248 ( 1.86E-02 )  |
| 1jfb   | 314    | 0.658 ( 1.32E-40 ) | 0.703 ( 2.31E-48 )  | 0.609 ( 1.42E-33 )  | 0.639 ( 1.13E-37 ) | 0.554 ( 6.18E-27 )  |
| 1k5c   | 288    | 0.608 ( 8.90E-31 ) | 0.716 ( 6.87E-47 )  | 0.759 ( 1.48E-55 )  | 0.739 ( 3.49E-51 ) | 0.805 ( 3.08E-67 )  |
| 1kth   | 21     | 0.789 ( 1.07E-05 ) | 0.539 ( 5.86E-03 )  | 0.894 ( 2.38E-08 )  | 0.788 ( 1.12E-05 ) | 0.935 ( 2.78E-10 )  |
| 1kwf   | 288    | 0.528 ( 2.27E-22 ) | 0.499 ( 7.18E-20 )  | 0.569 ( 2.15E-26 )  | 0.432 ( 8.02E-15 ) | 0.654 ( 7.60E-37 )  |
| 1l9l   | 33     | 0.265 ( 6.83E-02 ) | 0.14 ( 2.18E-01 )   | 0.557 ( 3.85E-04 )  | 0.453 ( 4.04E-03 ) | 0.415 ( 8.23E-03 )  |
| 1llk   | 55     | 0.394 ( 1.47E-03 ) | 0.848 ( 1.59E-16 )  | 0.706 ( 8.92E-10 )  | 0.707 ( 8.28E-10 ) | 0.802 ( 8.87E-14 )  |
| 1lni   | 103    | 0.2 ( 2.15E-02 )   | 0.418 ( 5.58E-06 )  | 0.538 ( 2.30E-09 )  | 0.449 ( 9.63E-07 ) | 0.507 ( 2.25E-08 )  |
| 1llug  | 187    | 0.603 ( 3.40E-20 ) | 0.704 ( 1.27E-29 )  | 0.698 ( 6.79E-29 )  | 0.611 ( 8.64E-21 ) | 0.672 ( 3.18E-26 )  |
| 1mlq   | 47     | 0.188 ( 1.02E-01 ) | 0.831 ( 2.44E-13 )  | 0.407 ( 2.28E-03 )  | 0.597 ( 4.76E-06 ) | 0.586 ( 7.67E-06 )  |
| 1m40   | 95     | 0.617 ( 1.42E-11 ) | 0.725 ( 5.21E-17 )  | 0.603 ( 4.81E-11 )  | 0.655 ( 3.09E-13 ) | 0.734 ( 1.23E-17 )  |
| 1mc2   | 77     | 0.704 ( 4.79E-13 ) | 0.65 ( 7.76E-11 )   | 0.872 ( 3.03E-25 )  | 0.819 ( 4.46E-20 ) | 0.723 ( 5.67E-14 )  |
| 1mj5   | 211    | 0.741 ( 2.63E-38 ) | 0.634 ( 2.17E-25 )  | 0.68 ( 2.86E-30 )   | 0.733 ( 4.25E-37 ) | 0.657 ( 9.34E-28 )  |
| 1muw   | 202    | 0.58 ( 7.19E-20 )  | 0.304 ( 5.51E-06 )  | 0.322 ( 1.52E-06 )  | 0.283 ( 2.28E-05 ) | 0.303 ( 5.90E-06 )  |
| 1mwq   | 147    | 0.583 ( 4.64E-15 ) | 0.593 ( 1.21E-15 )  | 0.697 ( 4.88E-23 )  | 0.747 ( 8.64E-28 ) | 0.736 ( 1.31E-26 )  |
| 1n4w   | 404    | 0.657 ( 1.19E-51 ) | 0.675 ( 2.50E-55 )  | 0.74 ( 1.64E-71 )   | 0.751 ( 8.92E-75 ) | 0.633 ( 5.58E-47 )  |
| 1n55   | 181    | 0.874 ( 2.27E-58 ) | 0.711 ( 2.01E-29 )  | 0.831 ( 1.03E-47 )  | 0.861 ( 8.04E-55 ) | 0.842 ( 4.26E-50 )  |
| 1nki   | 203    | 0.627 ( 7.32E-24 ) | 0.785 ( 5.11E-44 )  | 0.751 ( 2.18E-38 )  | 0.772 ( 1.02E-41 ) | 0.716 ( 1.45E-33 )  |
| 1nls   | 166    | 0.746 ( 4.97E-31 ) | 0.822 ( 3.23E-42 )  | 0.887 ( 3.06E-57 )  | 0.877 ( 1.71E-54 ) | 0.937 ( 5.57E-77 )  |
| 1nwz   | 58     | 0.485 ( 5.64E-05 ) | 0.496 ( 3.75E-05 )  | 0.648 ( 1.96E-08 )  | 0.596 ( 3.91E-07 ) | 0.447 ( 2.19E-04 )  |
| 1o7j   | 1237   | 0.463 ( 3.73E-67 ) | 0.662 ( 2.57E-157 ) | 0.587 ( 6.32E-116 ) | 0.522 ( 1.18E-87 ) | 0.646 ( 3.44E-147 ) |
| 1oai   | 27     | 0.826 ( 5.56E-08 ) | 0.743 ( 4.56E-06 )  | 0.713 ( 1.50E-05 )  | 0.729 ( 8.12E-06 ) | 0.63 ( 2.13E-04 )   |
| 1od3   | 90     | 0.465 ( 1.94E-06 ) | 0.724 ( 3.60E-16 )  | 0.592 ( 4.04E-10 )  | 0.698 ( 1.02E-14 ) | 0.555 ( 6.78E-09 )  |
| 1ok0   | 30     | 0.722 ( 3.31E-06 ) | 0.569 ( 5.17E-04 )  | 0.691 ( 1.17E-05 )  | 0.720 ( 3.57E-06 ) | 0.873 ( 1.61E-10 )  |
| 1pq7   | 163    | 0.624 ( 2.96E-19 ) | 0.775 ( 3.59E-34 )  | 0.747 ( 1.24E-30 )  | 0.738 ( 1.20E-29 ) | 0.659 ( 5.81E-22 )  |
| 1r2m   | 85     | 0.517 ( 2.08E-07 ) | 0.562 ( 1.07E-08 )  | 0.661 ( 2.89E-12 )  | 0.627 ( 6.81E-11 ) | 0.505 ( 4.17E-07 )  |
| 1r6j   | 27     | 0.401 ( 1.90E-02 ) | 0.358 ( 3.33E-02 )  | 0.309 ( 5.81E-02 )  | 0.650 ( 1.20E-04 ) | 0.601 ( 4.60E-04 )  |
| 1rb9   | 18     | 0.631 ( 2.50E-03 ) | 0.837 ( 7.25E-06 )  | 0.806 ( 2.69E-05 )  | 0.658 ( 1.49E-03 ) | 0.825 ( 1.25E-05 )  |
| 1rtq   | 245    | 0.442 ( 1.91E-13 ) | 0.681 ( 5.17E-35 )  | 0.755 ( 8.73E-47 )  | 0.649 ( 5.85E-31 ) | 0.6 ( 1.28E-25 )    |
| 1sfd   | 164    | 0.737 ( 1.15E-29 ) | 0.715 ( 2.74E-27 )  | 0.802 ( 2.20E-38 )  | 0.764 ( 5.72E-33 ) | 0.715 ( 3.22E-27 )  |
| 1ssx   | 134    | 0.777 ( 1.43E-28 ) | 0.713 ( 2.25E-22 )  | 0.843 ( 1.35E-37 )  | 0.847 ( 2.58E-38 ) | 0.752 ( 6.17E-26 )  |
| 1tg0   | 29     | 0.765 ( 6.90E-07 ) | 0.845 ( 4.15E-09 )  | 0.629 ( 1.27E-04 )  | 0.619 ( 1.73E-04 ) | 0.421 ( 1.15E-02 )  |
| 1tqg   | 31     | 0.557 ( 5.61E-04 ) | 0.38 ( 1.75E-02 )   | 0.253 ( 8.53E-02 )  | 0.371 ( 2.01E-02 ) | 0.276 ( 6.64E-02 )  |
| 1tt8   | 117    | 0.684 ( 9.62E-18 ) | 0.675 ( 3.44E-17 )  | 0.724 ( 1.49E-20 )  | 0.617 ( 6.54E-14 ) | 0.619 ( 5.06E-14 )  |
| 1u2h   | 47     | 0.753 ( 5.04E-10 ) | 0.823 ( 6.40E-13 )  | 0.877 ( 3.01E-16 )  | 0.849 ( 2.31E-14 ) | 0.797 ( 1.08E-11 )  |
| 1ufy   | 63     | 0.641 ( 7.55E-09 ) | 0.748 ( 8.83E-13 )  | 0.665 ( 1.38E-09 )  | 0.695 ( 1.26E-10 ) | 0.785 ( 1.31E-14 )  |

|      |     |                    |                     |                    |                    |                     |
|------|-----|--------------------|---------------------|--------------------|--------------------|---------------------|
| lug6 | 385 | 0.513 ( 1.55E-27 ) | 0.844 ( 4.86E-106 ) | 0.616 ( 5.90E-42 ) | 0.503 ( 2.37E-26 ) | 0.632 ( 1.06E-44 )  |
| lunq | 69  | 0.625 ( 4.63E-09 ) | 0.815 ( 8.36E-18 )  | 0.834 ( 3.02E-19 ) | 0.722 ( 1.27E-12 ) | 0.809 ( 2.09E-17 )  |
| lus0 | 203 | 0.748 ( 7.25E-38 ) | 0.708 ( 1.97E-32 )  | 0.767 ( 7.25E-41 ) | 0.807 ( 4.28E-48 ) | 0.598 ( 2.26E-21 )  |
| lv0l | 241 | 0.609 ( 3.73E-26 ) | 0.753 ( 1.37E-45 )  | 0.731 ( 6.63E-42 ) | 0.720 ( 4.88E-40 ) | 0.715 ( 2.97E-39 )  |
| lv6p | 41  | 0.704 ( 1.38E-07 ) | 0.168 ( 1.47E-01 )  | 0.016 ( 4.60E-01 ) | 0.129 ( 2.11E-01 ) | 0.026 ( 4.36E-01 )  |
| lvbw | 20  | 0.53 ( 8.08E-03 )  | 0.826 ( 3.65E-06 )  | 0.838 ( 2.00E-06 ) | 0.905 ( 2.11E-08 ) | 0.721 ( 1.69E-04 )  |
| lvyr | 317 | 0.64 ( 3.46E-38 )  | 0.641 ( 2.10E-38 )  | 0.519 ( 1.56E-23 ) | 0.531 ( 9.62E-25 ) | 0.555 ( 2.64E-27 )  |
| lvyy | 59  | 0.682 ( 1.32E-09 ) | 0.771 ( 4.74E-13 )  | 0.883 ( 1.05E-20 ) | 0.879 ( 2.74E-20 ) | 0.773 ( 3.72E-13 )  |
| lw0n | 72  | 0.235 ( 2.37E-02 ) | 0.493 ( 5.30E-06 )  | 0.574 ( 6.98E-08 ) | 0.540 ( 4.97E-07 ) | 0.312 ( 3.79E-03 )  |
| lx6z | 58  | 0.509 ( 2.29E-05 ) | 0.73 ( 4.06E-11 )   | 0.626 ( 7.27E-08 ) | 0.682 ( 1.87E-09 ) | 0.727 ( 4.97E-11 )  |
| lx8q | 94  | 0.693 ( 5.14E-15 ) | 0.675 ( 4.50E-14 )  | 0.616 ( 1.96E-11 ) | 0.564 ( 1.58E-09 ) | 0.669 ( 8.65E-14 )  |
| lxmk | 34  | 0.815 ( 2.22E-09 ) | 0.651 ( 1.55E-05 )  | 0.93 ( 8.97E-16 )  | 0.812 ( 2.72E-09 ) | 0.945 ( 1.94E-17 )  |
| ly55 | 167 | 0.617 ( 3.15E-19 ) | 0.651 ( 8.48E-22 )  | 0.701 ( 2.52E-26 ) | 0.665 ( 5.53E-23 ) | 0.69 ( 2.85E-25 )   |
| lylj | 193 | 0.734 ( 3.39E-34 ) | 0.668 ( 1.31E-26 )  | 0.712 ( 1.92E-31 ) | 0.644 ( 2.93E-24 ) | 0.521 ( 4.27E-15 )  |
| lzk4 | 146 | 0.715 ( 2.00E-24 ) | 0.618 ( 4.54E-17 )  | 0.754 ( 2.37E-28 ) | 0.742 ( 4.41E-27 ) | 0.68 ( 2.00E-21 )   |
| lzzk | 32  | 0.727 ( 1.24E-06 ) | 0.795 ( 2.82E-08 )  | 0.759 ( 2.41E-07 ) | 0.880 ( 1.60E-11 ) | 0.915 ( 1.13E-13 )  |
| 2bt9 | 210 | 0.547 ( 4.11E-18 ) | 0.631 ( 4.65E-25 )  | 0.604 ( 1.48E-22 ) | 0.518 ( 3.88E-16 ) | 0.605 ( 1.11E-22 )  |
| 2bw4 | 167 | 0.568 ( 6.18E-16 ) | 0.642 ( 4.09E-21 )  | 0.65 ( 1.08E-21 )  | 0.244 ( 7.51E-04 ) | 0.767 ( 5.70E-34 )  |
| 2cws | 159 | 0.748 ( 5.07E-30 ) | 0.618 ( 2.12E-18 )  | 0.841 ( 5.54E-44 ) | 0.787 ( 4.15E-35 ) | 0.615 ( 3.25E-18 )  |
| 2f01 | 169 | 0.584 ( 3.84E-17 ) | 0.605 ( 1.45E-18 )  | 0.613 ( 4.19E-19 ) | 0.680 ( 1.40E-24 ) | 0.634 ( 1.09E-20 )  |
| 2fdn | 19  | 0.372 ( 5.86E-02 ) | 0.421 ( 3.62E-02 )  | 0.558 ( 6.51E-03 ) | 0.411 ( 4.02E-02 ) | -0.027 ( 5.43E-01 ) |
| 2pvb | 55  | 0.253 ( 3.15E-02 ) | 0.487 ( 8.20E-05 )  | 0.448 ( 2.98E-04 ) | 0.605 ( 5.07E-07 ) | 0.616 ( 2.71E-07 )  |
| 3lzt | 67  | 0.719 ( 3.51E-12 ) | 0.781 ( 3.09E-15 )  | 0.758 ( 5.90E-14 ) | 0.748 ( 1.69E-13 ) | 0.642 ( 2.36E-09 )  |
| 7a3h | 243 | 0.713 ( 2.42E-39 ) | 0.789 ( 2.76E-53 )  | 0.774 ( 4.38E-50 ) | 0.755 ( 2.17E-46 ) | 0.767 ( 1.24E-48 )  |
